# Supplementary material
Source: MDPI journal article supplement (https://www.mdpi.com/2073-4344/7/7/200)
Supplement: s1 [file s1]

# Supplementary Materials: Article Activated Carbon Supported Mo-Ti-N Binary Transition Metal Nitride as Catalyst for Acetylene Hydrochlorination

Hui Dai , Mingyuan Zhu , Haiyang Zhang , Feng Yu , Chao Wang and Bin Dai

## Table of content:

**Fig.S1.** The N<sub>2</sub> adsorption-desorption isotherms for (a) fresh and (b) spend catalysts.

**Fig.S2.** Representative TEM figures of (a) used-Mo<sub>2</sub>N/AC; (b) used-TiN/AC and (c) used-Mo<sub>3</sub>Ti1N/AC, respectively.

**Fig.S3.** XPS spectra of Mo<sub>2</sub>N/AC, TiN/AC and Mo<sub>3</sub>Ti1N/AC.

**Fig.S4.** TG-DTG curves of six different catalysts: (a) Mo<sub>2</sub>N/AC, (b) TiN/AC, (c) Mo<sub>1</sub>Ti1N/AC, (d) Mo<sub>2</sub>Ti1N/AC, (e) Mo<sub>3</sub>Ti1N/AC and (f) Mo<sub>4</sub>Ti1N/AC.

**Table S1.** N contents in catalysts analysis by EA.

**Table S2.** Metal elements content in samples investigate by ICP.

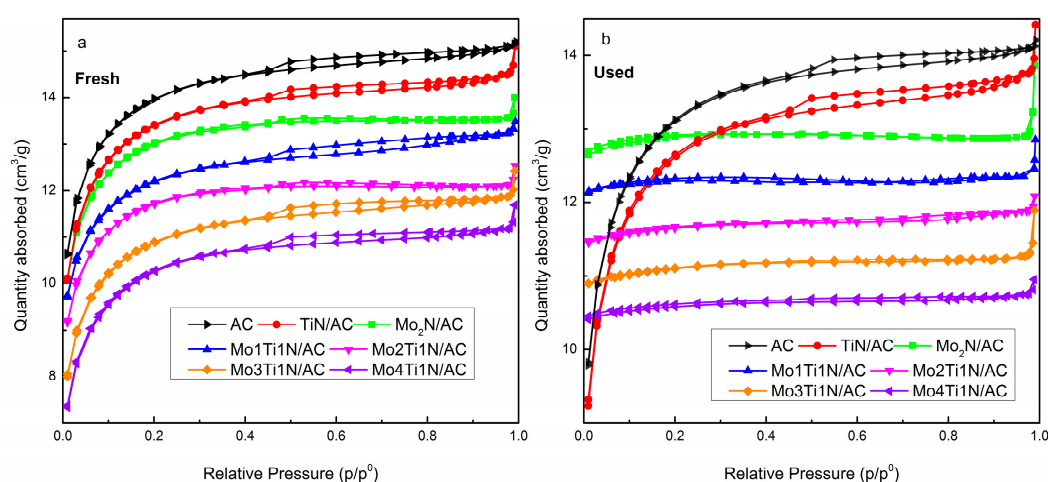

**Fig.S1.** The N<sub>2</sub> adsorption-desorption isotherms for (a) fresh and (b) spend catalysts.

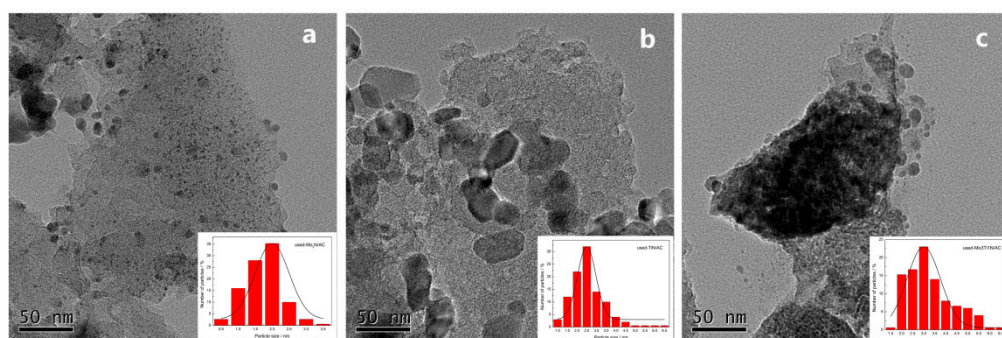

**Fig.S2.** Representative TEM figures of (a) used-Mo<sub>2</sub>N/AC; (b) used-TiN/AC and (c) used-Mo<sub>3</sub>Ti1N/AC, respectively.

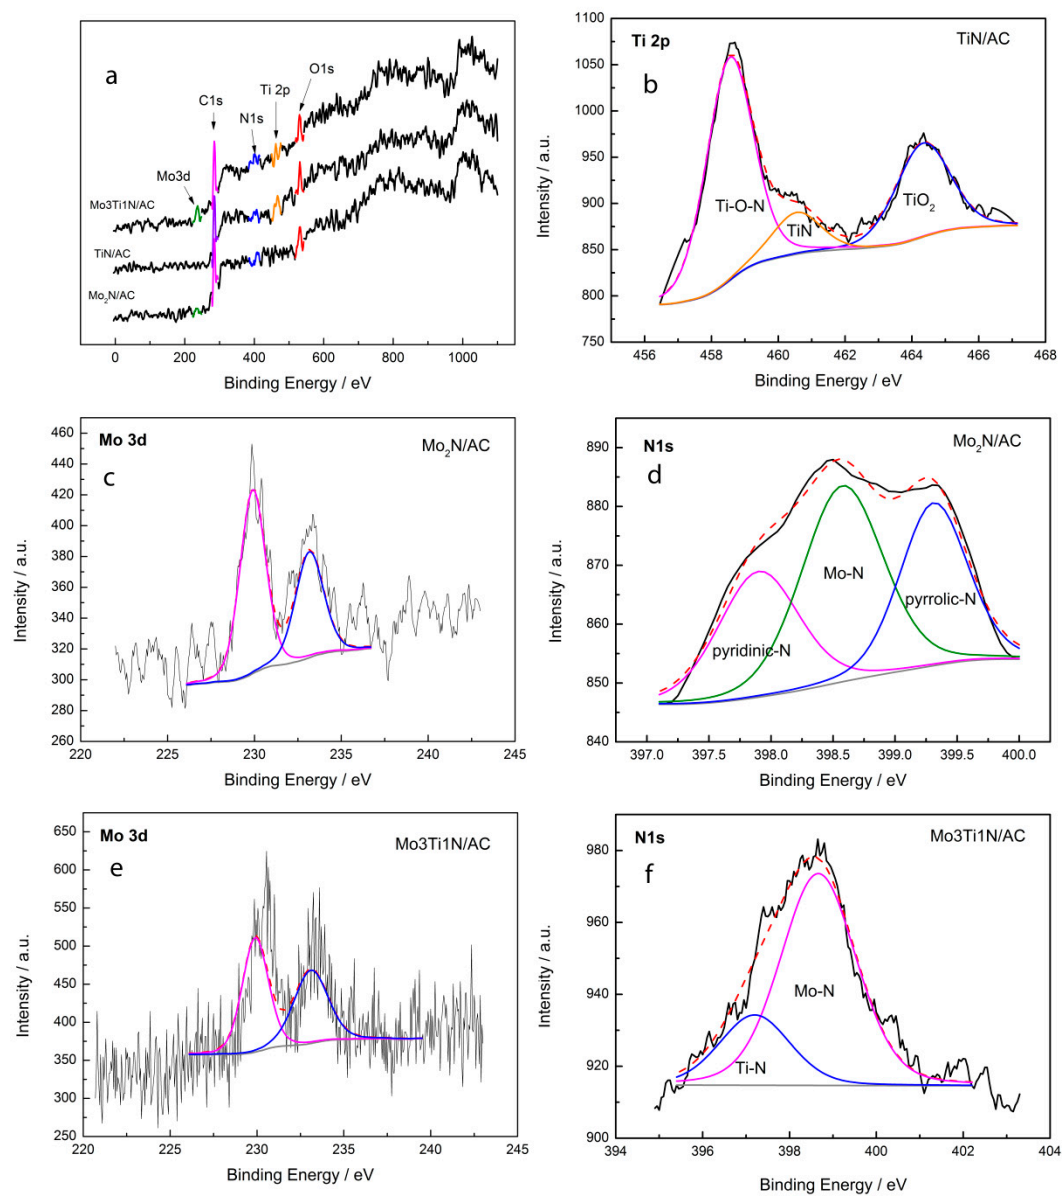

**Fig.S3.** XPS spectra of Mo<sub>2</sub>N/AC, TiN/AC and Mo<sub>3</sub>Ti<sub>1</sub>N/AC.

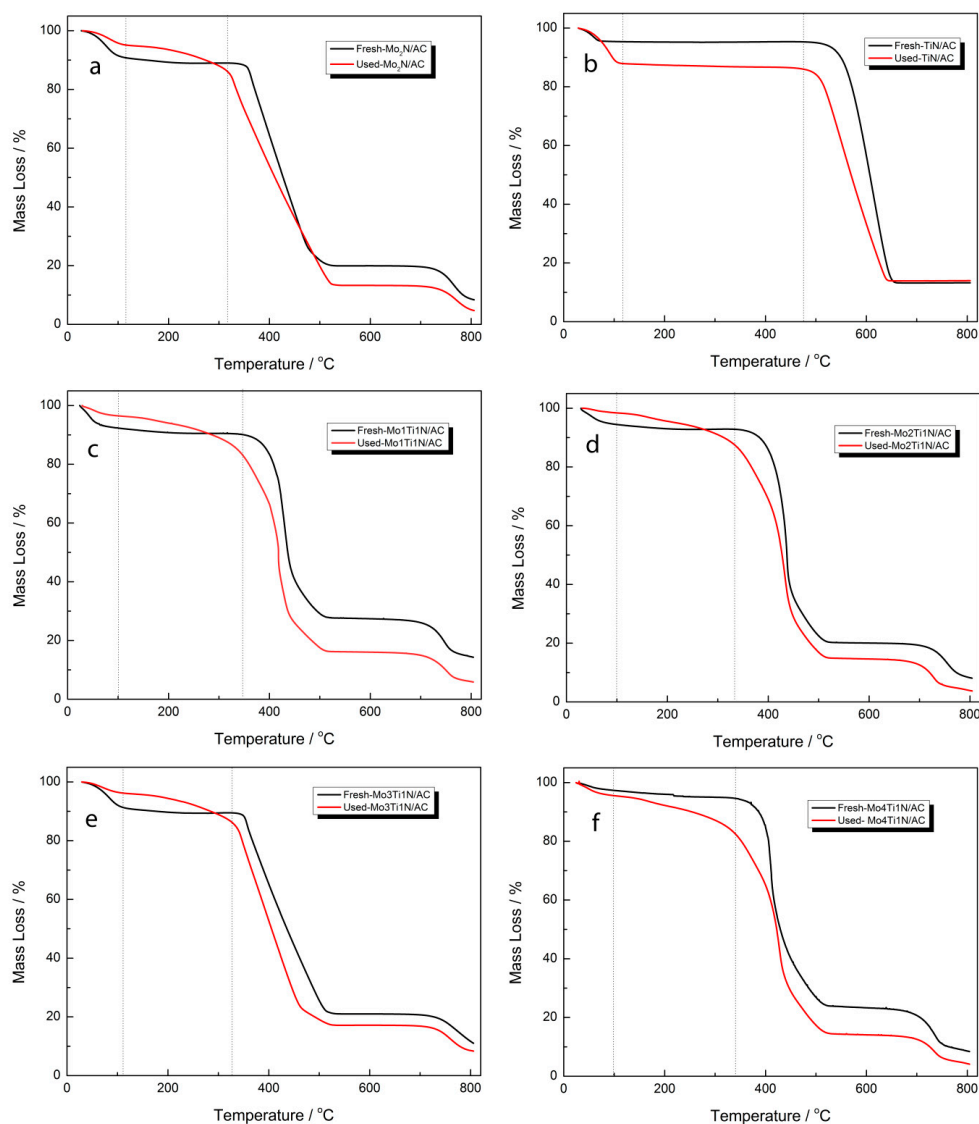

**Fig.S4.** TG-DTG curves of six different catalysts: (a) Mo<sub>2</sub>N/AC, (b) TiN/AC, (c) Mo<sub>1</sub>Ti<sub>1</sub>N/AC, (d) Mo<sub>2</sub>Ti<sub>1</sub>N/AC, (e) Mo<sub>3</sub>Ti<sub>1</sub>N/AC and (f) Mo<sub>4</sub>Ti<sub>1</sub>N/AC.

**Table S1.** N contents in catalysts analysis by EA.

| Catalyst                             | N Composition (%) |
|--------------------------------------|-------------------|
| AC                                   | 0.09              |
| Mo <sub>2</sub> N/AC                 | 1.73              |
| TiN/AC                               | 0.48              |
| Mo <sub>3</sub> Ti <sub>1</sub> N/AC | 1.54              |

**Table S2.** Metal elements content in samples investigate by ICP.

| Samples                              | Metal content / % |      |
|--------------------------------------|-------------------|------|
|                                      | Mo                | Ti   |
| Mo <sub>2</sub> N/AC                 | 4.39              | -    |
| TiN/AC                               | -                 | 4.03 |
| Mo <sub>3</sub> Ti <sub>1</sub> N/AC | 2.88              | 0.66 |
